# Supplementary material for: High-performance Removal of Anti-inflammatory Using Activated Carbon from Water Treatment Plant Sludge: Fixed-bed and Batch Studies
Source: Research Square preprint supplement (doi:10.21203/rs.3.rs-338372/v1), 2021-04-05
Supplement: Supplementary file 1 [file 13b32a4f40a46b2e4440d78a.docx]

| Models | Langmuir | Freundlich |
| --- | --- | --- |
|  | *qmax* = 274.99 | *KF* = 29.13 |
| Parameters | *KL* = 0.0161 | *nF* = 2.8271 |
| *R²* | 0.9770 | 0.9268 |
| *X²* | 36.16 | 181.45 |
| *ARE (%)* | 9.241 | 15.900 |
| *Fvalue* | 1074.37 | 1003.25 |
| *Ftabled* | 4.22 | 4.22 |
