# Supplementary material for: High-performance Removal of Anti-inflammatory Using Activated Carbon from Water Treatment Plant Sludge: Fixed-bed and Batch Studies
Source: Research Square preprint supplement (doi:10.21203/rs.3.rs-338372/v1), 2021-04-05
Supplement: Supplementary file 2 [file 707a4f6cc68e1dff45e11a94.docx]

| RUN | Ad (g L-1) | pH | (mg g-1) | *E* (%) |
| --- | --- | --- | --- | --- |
| 1 | -1 | -1 | 45.06 ± 0.08 | 59.77 ± 0.40 |
| 2 | 1 | -1 | 17.83 ± 0.17 | 95.31 ± 1.33 |
| 3 | -1 | 1 | 1.81 ± 0.03 | 2.46 ± 0.10 |
| 4 | 1 | 1 | 5.97 ± 0.32 | 31.93 ±1.48 |
| 5 (C) | 0 | 0 | 23.69 ± 0.41 | 79.43 ± 1.24 |
| 6 (C) | 0 | 0 | 24.65 ± 0.56 | 82.68 ± 2.04 |
| 7 (C) | 0 | 0 | 24.18 ± 0.91 | 82.68 ± 1.96 |
