# Supplementary material for: High-performance Removal of Anti-inflammatory Using Activated Carbon from Water Treatment Plant Sludge: Fixed-bed and Batch Studies
Source: Research Square preprint supplement (doi:10.21203/rs.3.rs-338372/v1), 2021-04-05
Supplement: Supplementary file 3 [file f44798cef9847f17dab8fa2a.docx]

| Models | Thomas | Yoon-Nelson | Thomas | Yoon-Nelson |
| --- | --- | --- | --- | --- |
|  | Column 1 | | Column 2 | |
| Parameters | *qmax* = 217.28 | *Kyn* = 0.04 | *qmax* = 53.32 | *Kyn* = 0.16 |
| *KL* = 0.22 | *Kth* = 0.70 |
| *R²* | 0.9965 | 0.9964 | 0.9753 | 0.9765 |
| *X²* | 23.80 | 24.03 | 78.80 | 163.68 |
| *ARE (%)* | 35.28 | 63.73 | 59.77 | 75.94 |
